# Supplementary material for: Synthesis of 2,5-dimethylhexene by isobutene dimerization with H2S co-feeding
Source: Royal Society of Chemistry journal article supplement (doi:10.1039/d3ra01324c), 2023-01-01

Figure S-1 XRD pattern of the iron component peeled off from the inner wall of the reactor after dimerization with H<sub>2</sub>S.

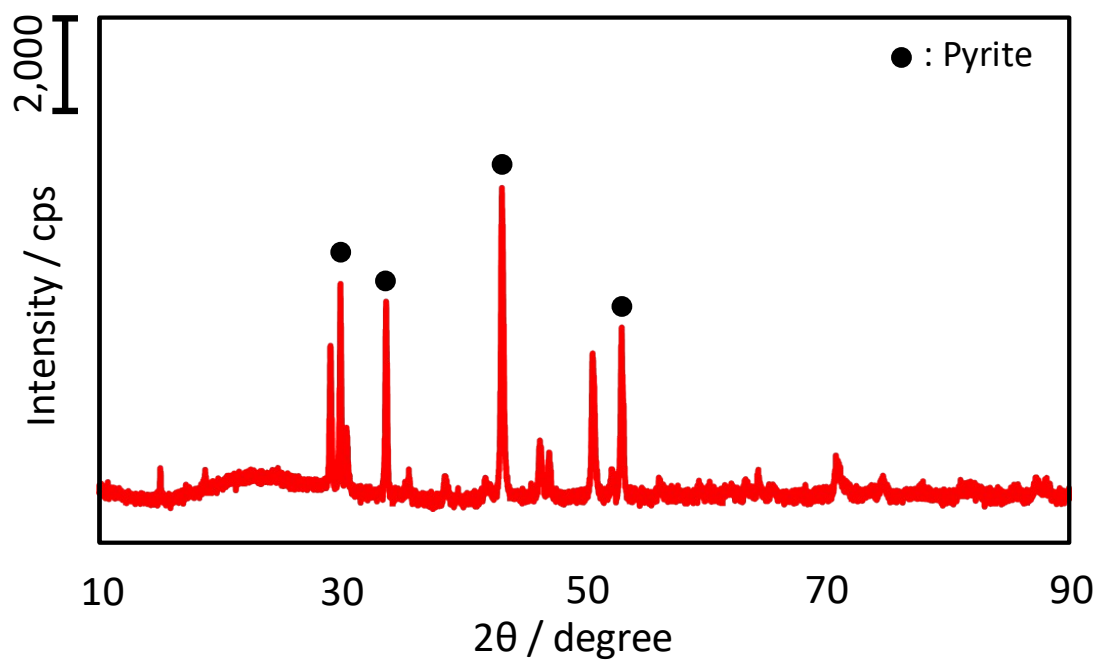

Figure S-2 (a) Carbon balance and isobutene conversion (b) yield of products in isobutene dimerization at 450 °C and 375 °C (*iso*-C<sub>4</sub>/H<sub>2</sub>S=2/1, 2.5atm).

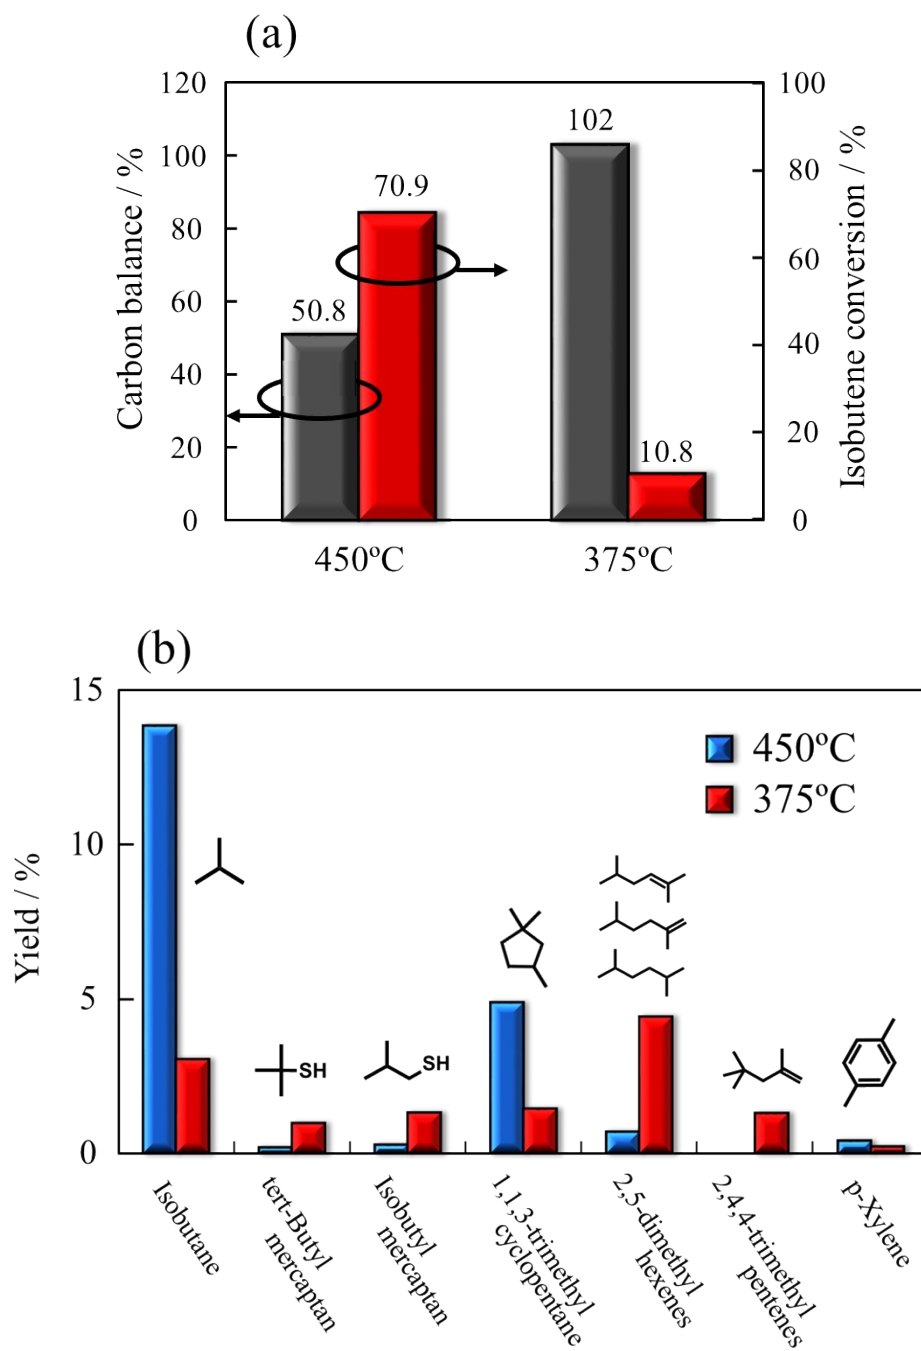

Figure S-3 GC-MS spectrum of tetralin-diluted liquid product in isobutene dimerization at 450 °C (*iso*-C<sub>4</sub>/H<sub>2</sub>S=2/1, 2.5atm).

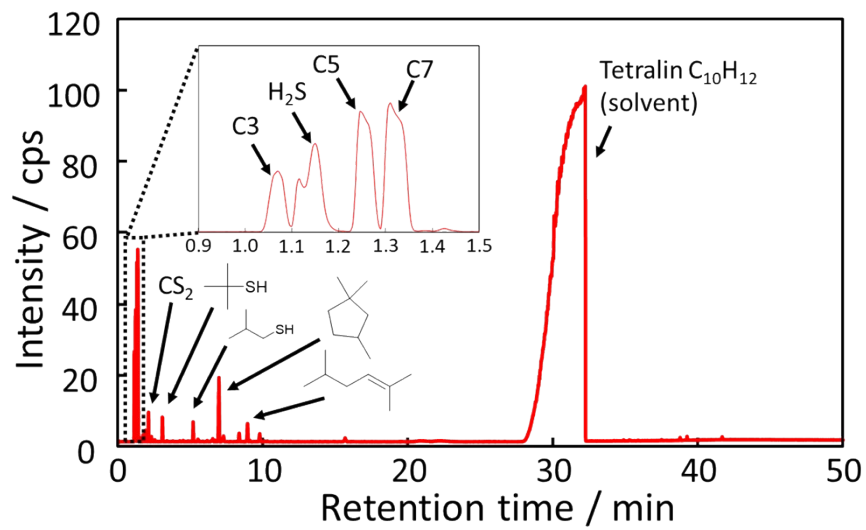

Figure S-4 (a) Carbon balance and isobutene conversion (b) yield of products in isobutene dimerization at 350°C and 375 °C ( $iso-C_4/H_2S=2/1, 2.5atm$ ).

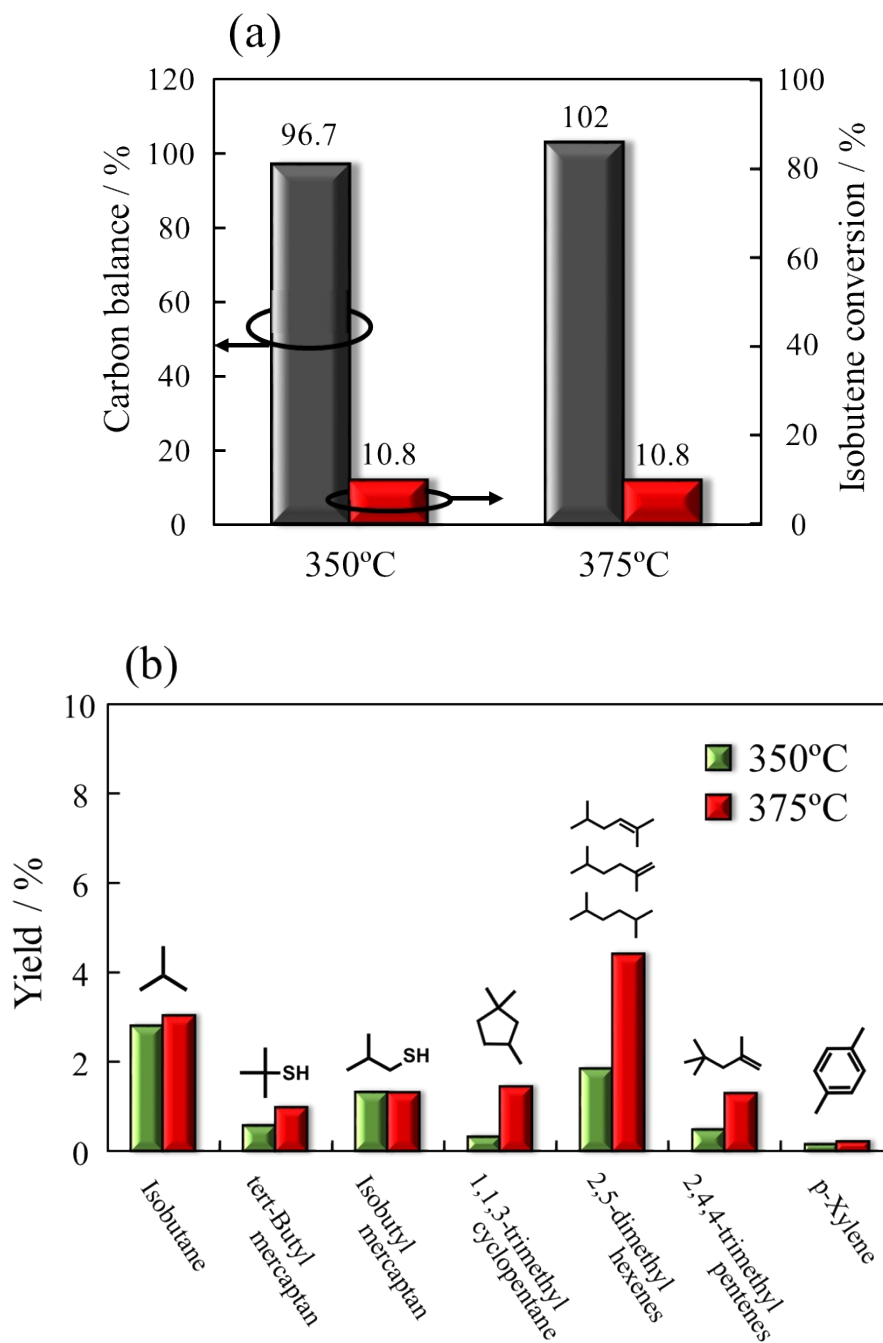

Figure S-5 (a) Carbon balance and isobutene conversion (b) yield of products in isobutene dimerization with  $iso-C_4/H_2S=1/5$  and  $iso-C_4/H_2S=2/1$  (375 °C, 2.5atm).

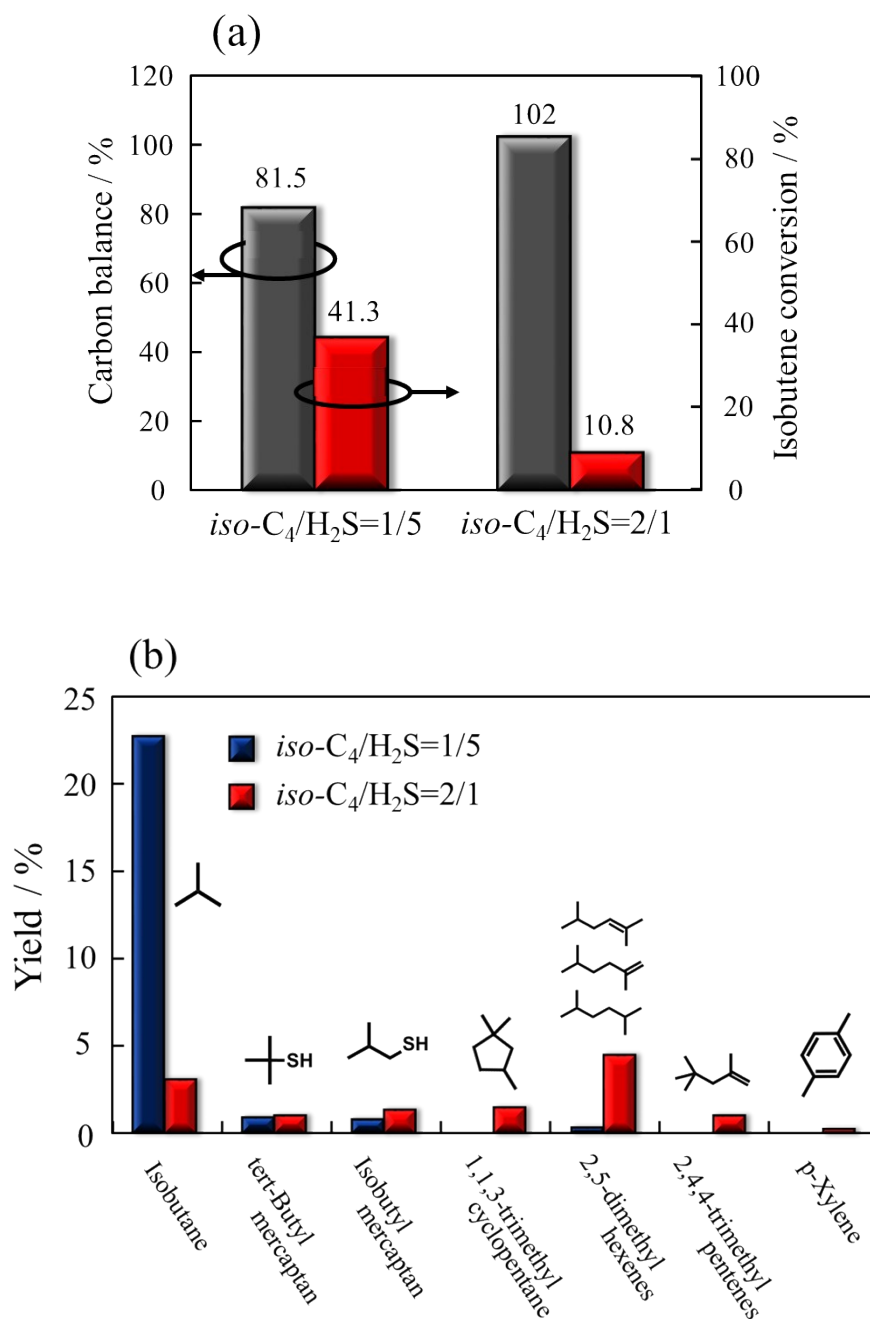

Supplement: d3ra01324c1.pdf [file d3ra01324c1.pdf]
